# Supplementary material for: Ultrathin 2D/2D ZnIn2S4/La2Ti2O7 nanosheets with a Z-scheme heterojunction for enhanced photocatalytic hydrogen evolution
Source: Royal Society of Chemistry journal article supplement (doi:10.1039/d4dt01559b), 2024-01-01
Supplement: d4dt01559b1.pdf [file d4dt01559b1.pdf]

## Supporting Information

# Ultrathin 2D/2D ZnIn<sub>2</sub>S<sub>4</sub>/La<sub>2</sub>Ti<sub>2</sub>O<sub>7</sub> nanosheets with Z-scheme heterojunction for enhanced photocatalytic hydrogen evolution

Hanbing Wang<sup>&</sup>, Yunqi Ning<sup>&</sup>, Qi Tang, Xueyang Li, Mengdi Hao, Qun Wei,  
Tingting Zhao, Daqi Lv, Hongwei Tian<sup>\*</sup>

*Key Laboratory of Automobile Materials of MOE and School of Materials Science and Engineering, Jilin University, Changchun, 130012, China*

<sup>\*</sup>Corresponding author. E-mail addresses: tianhw@jlu.edu.cn (H. Tian).

<sup>&</sup>These authors contributed equally to this work.

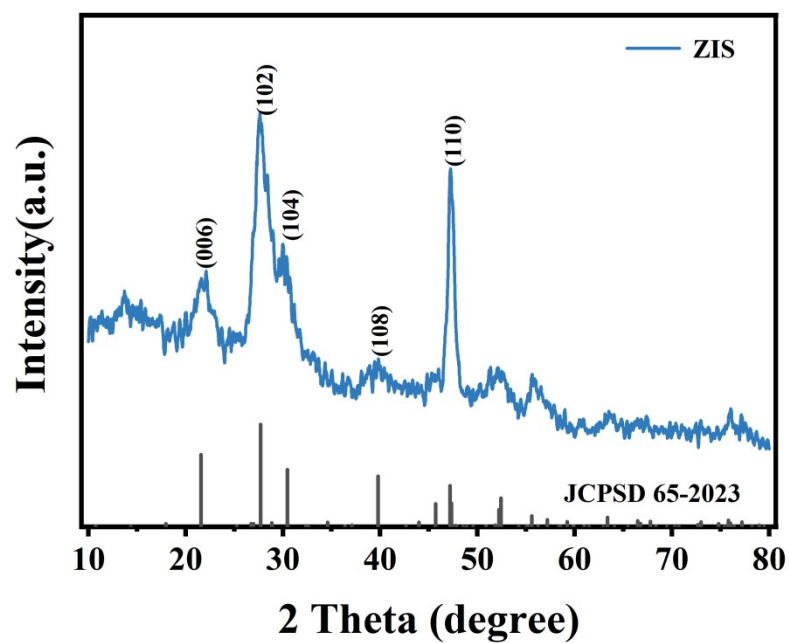

Figure S1. XRD pattern of ZnIn<sub>2</sub>S<sub>4</sub>.

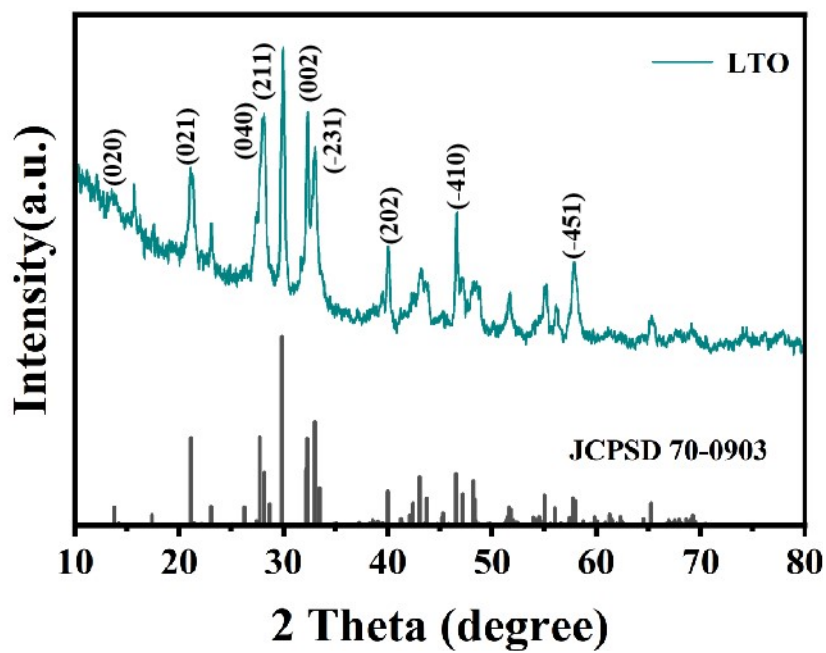

Figure S2. XRD pattern of La<sub>2</sub>Ti<sub>2</sub>O<sub>7</sub>.

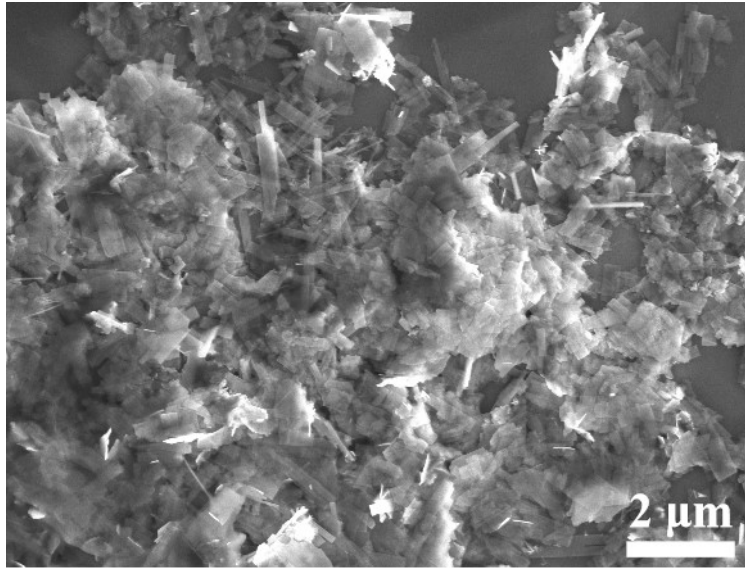

Figure S3. SEM image of La<sub>2</sub>Ti<sub>2</sub>O<sub>7</sub>.

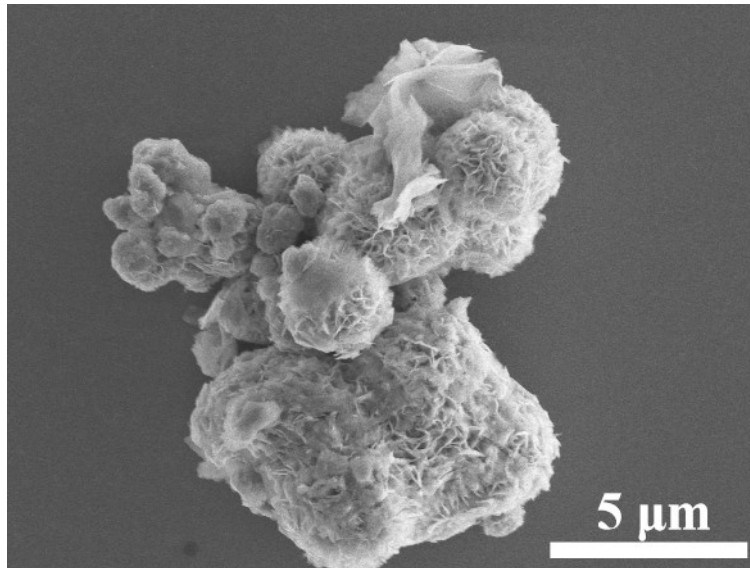

Figure S4. SEM image of ZnIn<sub>2</sub>S<sub>4</sub>.

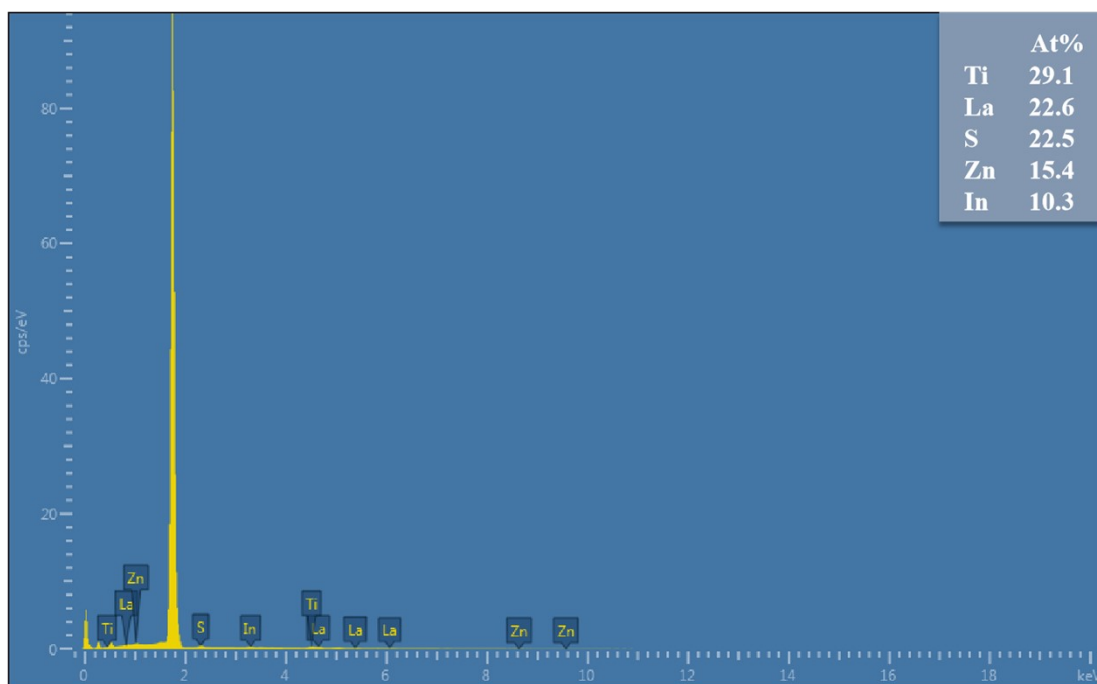

Figure S5. EDX spectrum of ZIS/LTO-0.1.

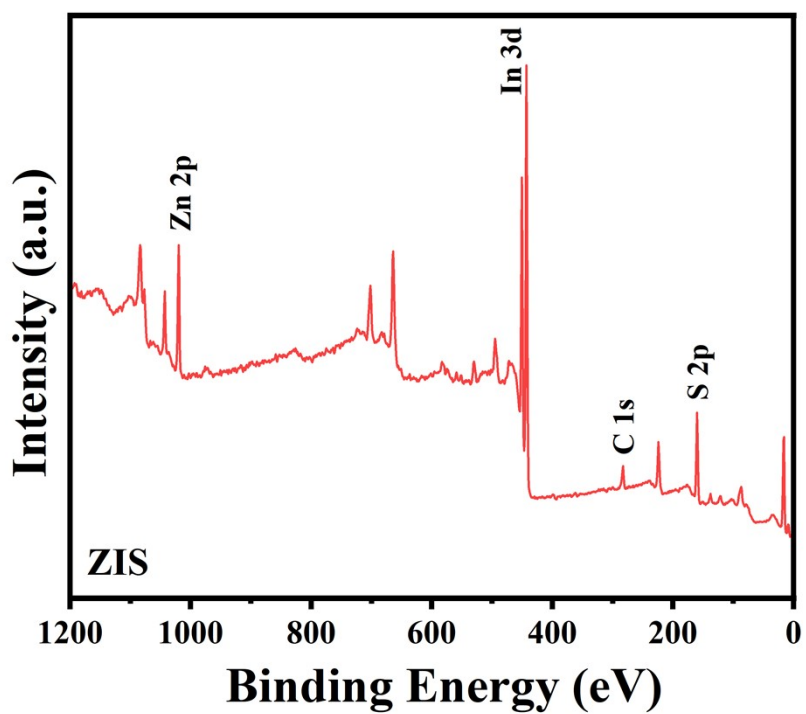

Figure S6. XPS spectra of ZIS.

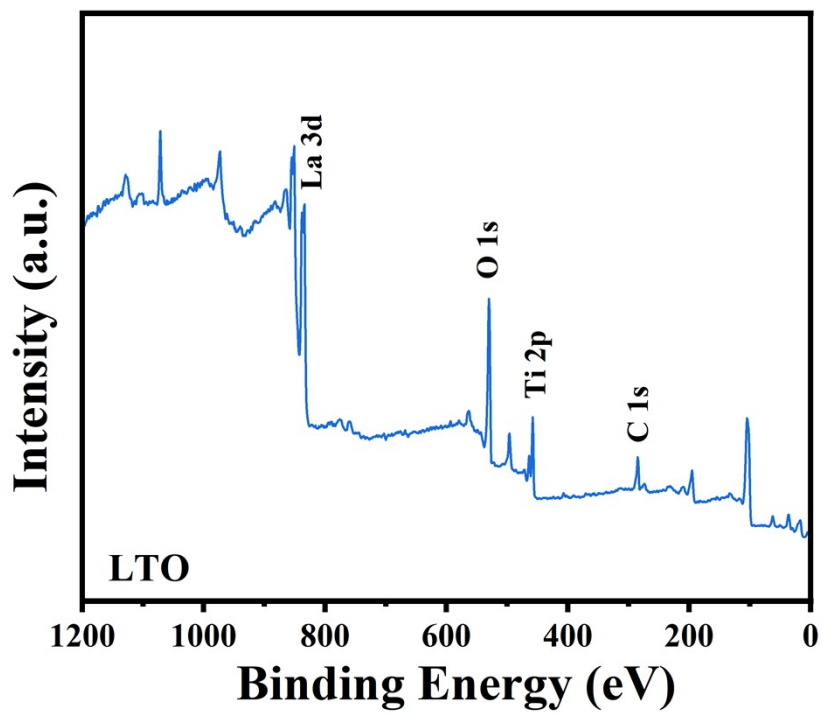

Figure S7. XPS spectra of LTO.

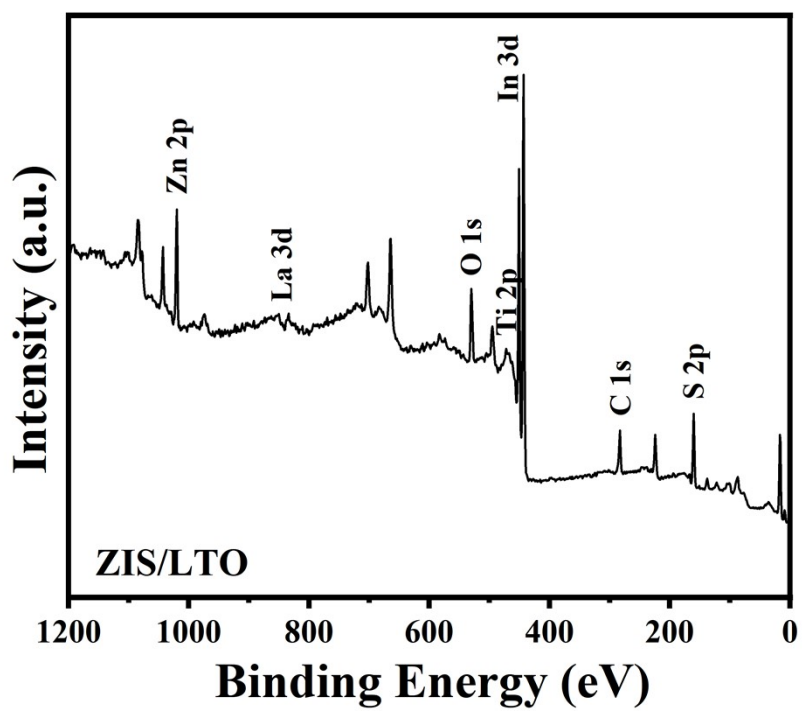

Figure S8. XPS spectra of ZIS/LTO-0.1.

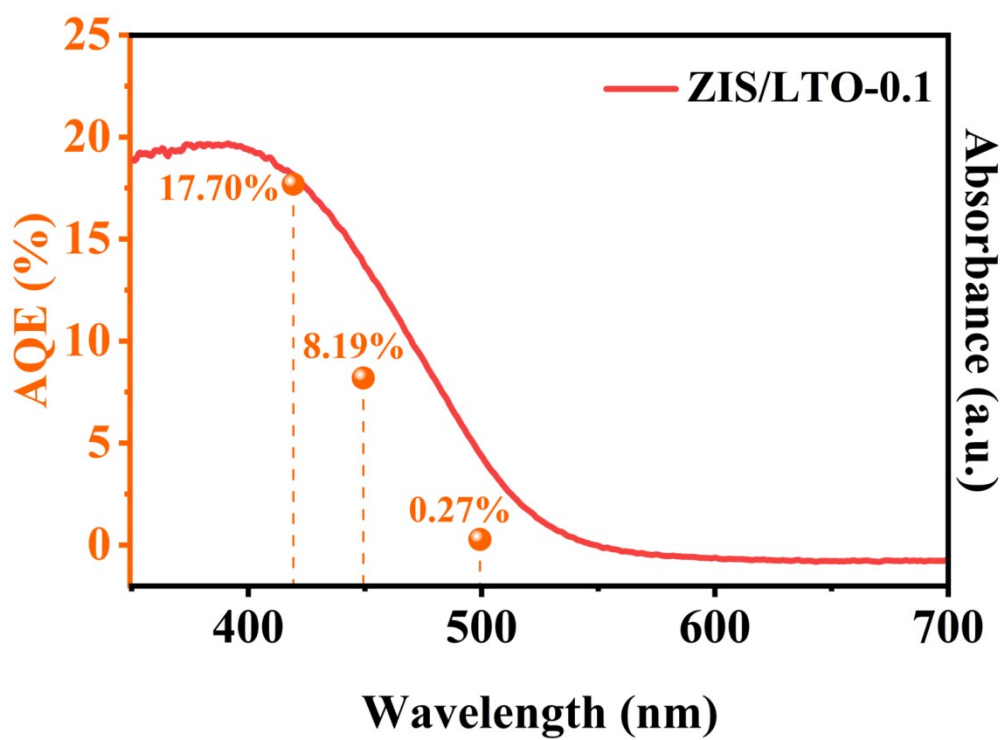

Figure S9. AQE values of ZCS@ZIS/MS at wavelengths of 420 nm, 450 nm and 500 nm.

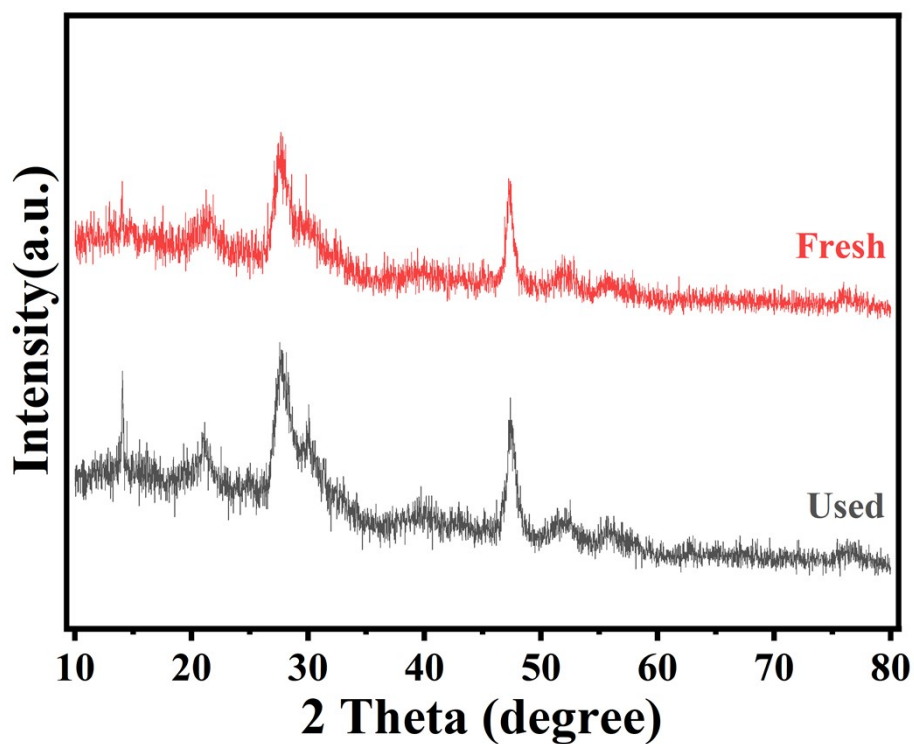

Figure S10. XRD patterns of fresh and used ZIS/LTO-0.1.

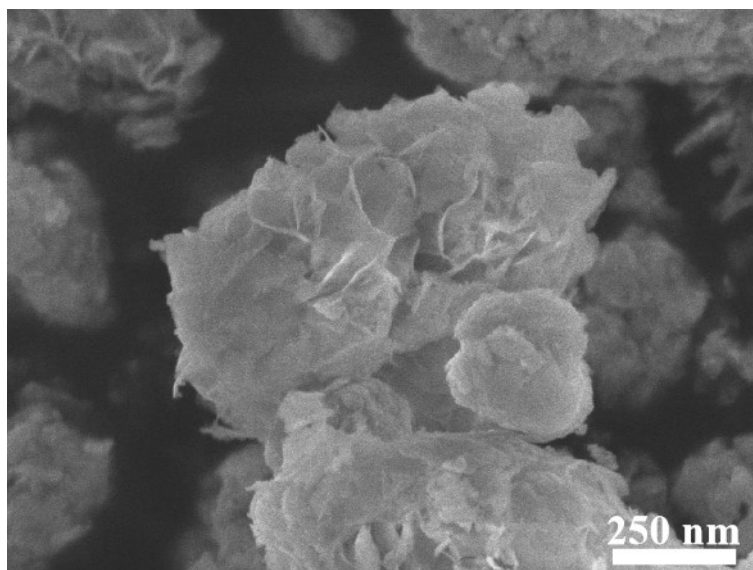

Figure S11. SEM image of ZIS/LTO-0.1 after photocatalysis.

Table S1. Comparison of photocatalytic H<sub>2</sub> generation performance with reported literatures.

| Catalyst                                                                                  | Catalyst dosage (mg) | Reaction conditions                        | Light source           | H <sub>2</sub> evolution rate (mmol h <sup>-1</sup> g <sup>-1</sup> ) | AQE (%)        | co-catalyst | Ref.      |
|-------------------------------------------------------------------------------------------|----------------------|--------------------------------------------|------------------------|-----------------------------------------------------------------------|----------------|-------------|-----------|
| 2D/2D<br>ZnIn <sub>2</sub> S <sub>4</sub> /La <sub>2</sub> Ti <sub>2</sub> O <sub>7</sub> | 20                   | 100 mL aqueous solution (20.vol% TEOA)     | 300 W Xe lamp (UV-vis) | 6.97                                                                  | 17.7<br>420 nm | /           | This work |
| Co <sub>3</sub> O <sub>4</sub> /La <sub>2</sub> Ti <sub>2</sub> O <sub>7</sub>            | 50                   | 100 mL aqueous solution (10.vol% methanol) | 300 W Xe lamp (UV-vis) | 0.08                                                                  | /              | /           | [1]       |

---

|                                                                                 |    |                                                                                                          |                                                           |      |                   |    |     |
|---------------------------------------------------------------------------------|----|----------------------------------------------------------------------------------------------------------|-----------------------------------------------------------|------|-------------------|----|-----|
| CdS/La <sub>2</sub> Ti <sub>2</sub> O <sub>7</sub>                              | 10 | 20 mL<br>aqueous<br>solution<br>(0.35 M<br>Na <sub>2</sub> S/0.25 M<br>Na <sub>2</sub> SO <sub>3</sub> ) | 500<br>mW·cm <sup>-2</sup><br>Xe lamp<br>(UV-vis)         | 2.30 | 2.1<br>400<br>nm  | /  | [2] |
| La <sub>2</sub> Ti <sub>2</sub> O <sub>7</sub> /g-C <sub>3</sub> N <sub>4</sub> | 50 | 100 mL<br>aqueous<br>solution<br>(10.vol%<br>TEOA)                                                       | LED lamp<br>(λ =<br>420nm)                                | 1.49 | 3.6<br>420<br>nm  | Pt | [3] |
| La <sub>2</sub> Ti <sub>2</sub> O <sub>7</sub> /In <sub>2</sub> S <sub>3</sub>  | 60 | 100 mL<br>aqueous<br>solution<br>(0.05 M<br>Na <sub>2</sub> S/Na <sub>2</sub> SO <sub>3</sub> )          | 300 W Xe<br>lamp(λ ≥<br>400 nm)                           | 0.16 | /                 | Pt | [4] |
| rGO/La <sub>2</sub> Ti <sub>2</sub> O <sub>7</sub> /NiFe<br>-LDH                | 20 | 40 mL<br>aqueous<br>solution<br>(10 vol.%<br>TEOA)                                                       | 100<br>mW·cm <sup>-2</sup><br>Xe lamp<br>(UV-vis-<br>NIR) | 0.53 | /                 | /  | [5] |
| ZnIn <sub>2</sub> S <sub>4</sub> @In(OH) <sub>3</sub><br>@CdS                   | 30 | 100 mL<br>aqueous<br>solution<br>(20 vol. %<br>lactic acid)                                              | 300W Xe<br>lamp<br>(λ > 420 n<br>m)                       | 1.38 | 19.2<br>420<br>nm | /  | [6] |
| ZnIn <sub>2</sub> S <sub>4</sub> /B-C <sub>3</sub> N <sub>4</sub>               | 20 | 100 mL<br>aqueous<br>solution<br>(10 vol.%<br>TEOA)                                                      | 300W Xe<br>lamp (λ ≥<br>420 nm)                           | 0.88 | /                 | /  | [7] |

---



---

|                                                                    |     |                                                                                                           |                                              |      |                   |   |      |
|--------------------------------------------------------------------|-----|-----------------------------------------------------------------------------------------------------------|----------------------------------------------|------|-------------------|---|------|
| ZnIn <sub>2</sub> S <sub>4</sub> /FePO <sub>4</sub>                | 50  | 100 mL<br>aqueous<br>solution<br>(0.35 M<br>Na <sub>2</sub> S/0.25 M<br>Na <sub>2</sub> SO <sub>3</sub> ) | 300W Xe<br>lamp ( $\lambda \geq$<br>420 nm)  | 3.34 | 4.7<br>420<br>nm  | / | [8]  |
| Co <sub>3</sub> O <sub>4</sub> @ZnIn <sub>2</sub> S <sub>4</sub>   | 100 | 275 mL<br>aqueous<br>solution<br>(20 vol.%<br>TEOA)                                                       | 300 W Xe<br>lamp ( $\lambda >$<br>420 nm)    | 4.47 | 20.2<br>420<br>nm | / | [9]  |
| ZnIn <sub>2</sub> S <sub>4</sub> /Cu <sub>2</sub> MoS <sub>4</sub> | 50  | 100 mL<br>aqueous<br>solution<br>(0.35 M<br>Na <sub>2</sub> S/0.25 M<br>Na <sub>2</sub> SO <sub>3</sub> ) | 300 W Xe<br>lamp ( $\lambda >$<br>420 nm)    | 1.30 | 4.7<br>420<br>nm  | / | [10] |
| ZnIn <sub>2</sub> S <sub>4</sub> /SnS <sub>2</sub>                 | 50  | 100 mL<br>aqueous<br>solution<br>(10 vol.%<br>TEOA)                                                       | 300 W Xe<br>lamp ( $\lambda \geq$<br>420 nm) | 1.13 | 9.8<br>420<br>nm  | / | [11] |
| Fe-Ni <sub>2</sub> P/ZnIn <sub>2</sub> S <sub>4</sub>              | 5   | 50 mL<br>aqueous<br>solution<br>(15 vol.%<br>TEOA)                                                        | 300 W Xe<br>lamp ( $\lambda >$<br>420 nm)    | 4.51 | 29.3<br>420<br>nm | / | [12] |
| Nb <sub>2</sub> O <sub>5</sub> /ZnIn <sub>2</sub> S <sub>4</sub>   | 10  | 100 mL<br>aqueous<br>solution<br>(10 vol.%<br>TEOA)                                                       | 300 W Xe<br>lamp ( $\lambda >$<br>400 nm)    | 5.40 | 3.3%<br>420<br>nm | / | [13] |

---

---

|                                                                    |     |                                                                                                           |                                           |      |                   |   |      |
|--------------------------------------------------------------------|-----|-----------------------------------------------------------------------------------------------------------|-------------------------------------------|------|-------------------|---|------|
| ZnIn <sub>2</sub> S <sub>4</sub> /BiFeO <sub>3</sub>               | 50  | 100 mL<br>aqueous<br>solution<br>(0.35 M<br>Na <sub>2</sub> S/0.25 M<br>Na <sub>2</sub> SO <sub>3</sub> ) | 300 W Xe<br>lamp ( $\lambda >$<br>420 nm) | 2.88 | 15.7<br>420<br>nm | / | [14] |
| ZnIn <sub>2</sub> S <sub>4</sub> /Mo <sub>2</sub> TiC <sub>2</sub> | 100 | 100 mL<br>aqueous<br>solution<br>(10 vol.%<br>TEOA)                                                       | 300 W Xe<br>lamp ( $\lambda >$<br>420 nm) | 3.12 | 8.6<br>420<br>nm  | / | [15] |

---

## References

- [1] H.D. Wen, W.N. Zhao, X.X. Han, Constructing  $\text{Co}_3\text{O}_4/\text{La}_2\text{Ti}_2\text{O}_7$  p-n Heterojunction for the Enhancement of Photocatalytic Hydrogen Evolution, *Nanomaterials* 12(10) (2022) 12101695, <http://dx.doi.org/10.3390/nano12101695>.
- [2] L. Mao, X.Y. Cai, M.S. Zhu, Hierarchically 1D CdS decorated on 2D perovskite-type  $\text{La}_2\text{Ti}_2\text{O}_7$  nanosheet hybrids with enhanced photocatalytic performance, *Rare Met.* 40(5) (2021) 1067-1076, <http://dx.doi.org/10.1007/s12598-020-01589-w>.
- [3] K. Wang, L.S. Jiang, X.Y. Wu, G.K. Zhang, Vacancy mediated Z-scheme charge transfer in a 2D/2D  $\text{La}_2\text{Ti}_2\text{O}_7/\text{g-C}_3\text{N}_4$  nanojunction as a bifunctional photocatalyst for solar-to-energy conversion, *J. Mater. Chem. A* 8(26) (2020) 13241-13247, <http://dx.doi.org/10.1039/d0ta01310b>.
- [4] E.B. Hua, S. Jin, X.R. Wang, S. Ni, G. Liu, X.X. Xu, Ultrathin 2D type-II p-n heterojunctions  $\text{La}_2\text{Ti}_2\text{O}_7/\text{In}_2\text{S}_3$  with efficient charge separations and photocatalytic hydrogen evolution under visible light illumination, *Appl. Catal. B-Environ.* 245 (2019) 733-742, <http://dx.doi.org/10.1016/j.apcatb.2019.01.024>.
- [5] R. Boppella, C.H. Choi, J. Moon, D.H. Kim, Spatial charge separation on strongly coupled 2D-hybrid of  $\text{rGO}/\text{La}_2\text{Ti}_2\text{O}_7/\text{NiFe-LDH}$  heterostructures for highly efficient noble metal free photocatalytic hydrogen generation, *Appl. Catal. B-Environ.* 239 (2018) 178-186, <http://dx.doi.org/10.1016/j.apcatb.2018.07.063>.
- [6] L.G. Ma, C. Lin, W.J. Jiang, L. Xu, Y.J. Shao, T.Y. Zhu, T. Zhao, X.Q. Ai, X.S. Wu, In-situ constructing  $\text{ZnIn}_2\text{S}_4@/\text{In}(\text{OH})_3@/\text{CdS}$  heterostructure for efficient photocatalytic  $\text{H}_2$  generation under visible light irradiation, *Int. J. Hydrogen Energy* 57 (2024) 290-300, <http://dx.doi.org/10.1016/j.ijhydene.2024.01.007>.
- [7] P.F. Tan, M.Y. Zhang, L. Yang, R.F. Ren, H.H. Zhai, H.L. Liu, J.Y. Chen, J. Pan, Modulated band structure in 2D/2D  $\text{ZnIn}_2\text{S}_4/\text{B-C}_3\text{N}_4$  S-scheme heterojunction for photocatalytic hydrogen evolution, *Diamond Relat. Mater.* 140 (2023) 110456, <http://dx.doi.org/10.1016/j.diamond.2023.110456>.
- [8] S.K. Wang, D. Zhang, D.F. Zhang, X.P. Pu, J.C. Liu, H.S. Li, P.Q. Cai, A novel hydrangea-like  $\text{ZnIn}_2\text{S}_4/\text{FePO}_4$  S-scheme heterojunction via internal electric field for boosted photocatalytic  $\text{H}_2$  evolution, *J. Alloys Compd.* 967 (2023) 171862, <http://dx.doi.org/10.1016/j.jallcom.2023.171862>.
- [9] S.Y. Zhang, G.X. Zhang, S.Z. Wu, Z.J. Guan, Q.Y. Li, J.J. Yang, Fabrication of  $\text{Co}_3\text{O}_4@/\text{ZnIn}_2\text{S}_4$  for photocatalytic hydrogen evolution: Insights into the synergistic mechanism of photothermal effect and heterojunction, *J. Colloid Interface Sci.* 650 (2023) 1974-1982, <http://dx.doi.org/10.1016/j.jcis.2023.07.147>.
- [10] S.K. Wang, D.F. Zhang, P. Su, X.T. Yao, J.C. Liu, X.P. Pu, H.S. Li, P.Q. Cai, In-situ preparation of mossy tile-like  $\text{ZnIn}_2\text{S}_4/\text{Cu}_2\text{MoS}_4$  S-scheme heterojunction for efficient photocatalytic  $\text{H}_2$  evolution under visible light, *J. Colloid Interface Sci.* 650 (2023) 825-835, <http://dx.doi.org/10.1016/j.jcis.2023.07.052>.
- [11] C.M. Zhang, J. Ma, H.B. Zhu, H.H. Ding, H.H. Wu, K.H. Zhang, X.L. Zhao, X.F. Wang, C.L. Cheng, Self-assembled  $\text{ZnIn}_2\text{S}_4/\text{SnS}_2$  QDs S-scheme heterojunction for boosted photocatalytic hydrogen evolution: Energy band engineering and mechanism, *J. Alloys Compd.* 960 (2023) 170932, <http://dx.doi.org/10.1016/j.jallcom.2023.170932>.
- [12] G.Q. Li, H.O. Liang, X.Y. Fan, X.L. Lv, X.W. Sun, H.G. Wang, J. Bai, Modulating and optimizing 2D/2D  $\text{Fe-Ni}_2\text{P}/\text{ZnIn}_2\text{S}_4$  with S vacancy through surface engineering for efficient photocatalytic  $\text{H}_2$  evolution, *J. Mater. Chem. A* 11(27) (2023) 14809-14818, <http://dx.doi.org/10.1039/d3ta02519e>.
- [13] H. Su, H.M. Lou, D.J. Yang, D.W. Gao, Y.X. Pang, X.Q. Qiu, 0D/2D  $\text{Nb}_2\text{O}_5/\text{ZnIn}_2\text{S}_4$

heterojunctions with enhanced utilization of light and separation of photogenerated carrier for efficient visible light photocatalytic performance, *Appl. Surf. Sci.* 629 (2023) 157455, <http://dx.doi.org/10.1016/j.apsusc.2023.157455>.

[14] D.F. Zhang, R.Q. Zhang, J.C. Liu, X.P. Pu, P.Q. Cai, 3D/2D ZnIn<sub>2</sub>S<sub>4</sub>/BiFeO<sub>3</sub> as S-scheme heterojunction photocatalyst for boosted visible-light hydrogen evolution, *J. Am. Ceram. Soc.* 106(8) (2023) 4785-4793, <http://dx.doi.org/10.1111/jace.19135>.

[15] Q. Xi, F.X. Xie, J.X. Liu, X.C. Zhang, J.C. Wang, Y.W. Wang, Y.F. Wang, H.F. Li, Z.B. Yu, Z.J. Sun, X. Jian, X.M. Gao, J. Ren, C.M. Fan, R. Li, In Situ Formation ZnIn<sub>2</sub>S<sub>4</sub>/Mo<sub>2</sub>TiC<sub>2</sub> Schottky Junction for Accelerating Photocatalytic Hydrogen Evolution Kinetics: Manipulation of Local Coordination and Electronic Structure, *Small* 19(24) (2023) 2300717, <http://dx.doi.org/10.1002/sml.202300717>.
